# Supplementary material
Source: PubMed Central journal article supplement (PMC7331211)
Supplement: ao0c01824_si_001.pdf [file ao0c01824_si_001.pdf]

Supporting information for:

Sapphire wafer for 226 nm far UVC generation with  
carbon nanotube based cold cathode electron beam  
(C-beam) irradiation

*Sung Tae Yoo, and Kyu Chang Park\**

Department of Information Display, Kyung Hee University, Dongdaemun-gu, Seoul, 02447,  
Korea

E-mail: [kyupark@khu.ac.kr](mailto:kyupark@khu.ac.kr)

1. The CNT emitters have dot size of  $3\ \mu\text{m}$  and height of about  $40\ \mu\text{m}$ . Cone-shaped CNT emitters are arranged horizontally and vertically at intervals of  $30\ \mu\text{m}$  in order to reduce field screening effect. The total number of CNT emitters in the square shape is 49 ea, including CNT emitters with the horizontal and vertical directions of 7 ea, respectively. We call group of these CNT emitters as island. These islands were fabricated on the Si wafer at  $0.5\ \text{mm}$  intervals and the total area of CNT emitters was  $188\ \text{mm}^2$ .

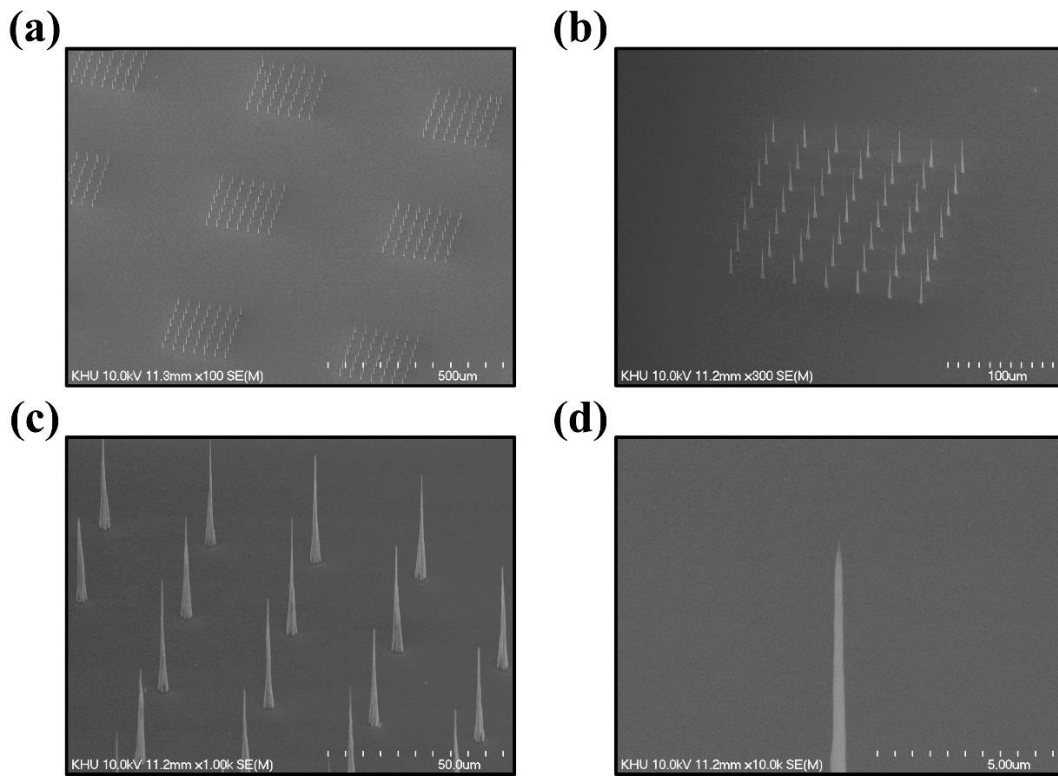

**Figure S1.** The SEM image of CNT emitters with variable magnification. The magnifications of the respective SEM images of (a), (b), (c), and (d) are 100, 300, 1,000, and 10,000 times.

2. The visible light produced by the PL in the sapphire wafer does not depend on the window materials. When the visible light generated with 5 mm thick quartz and 10 mm thick glass as the window was compared with the photograph and spectra measured by spectroradiometer (Konica Minolta, CS-1000), there was no difference.

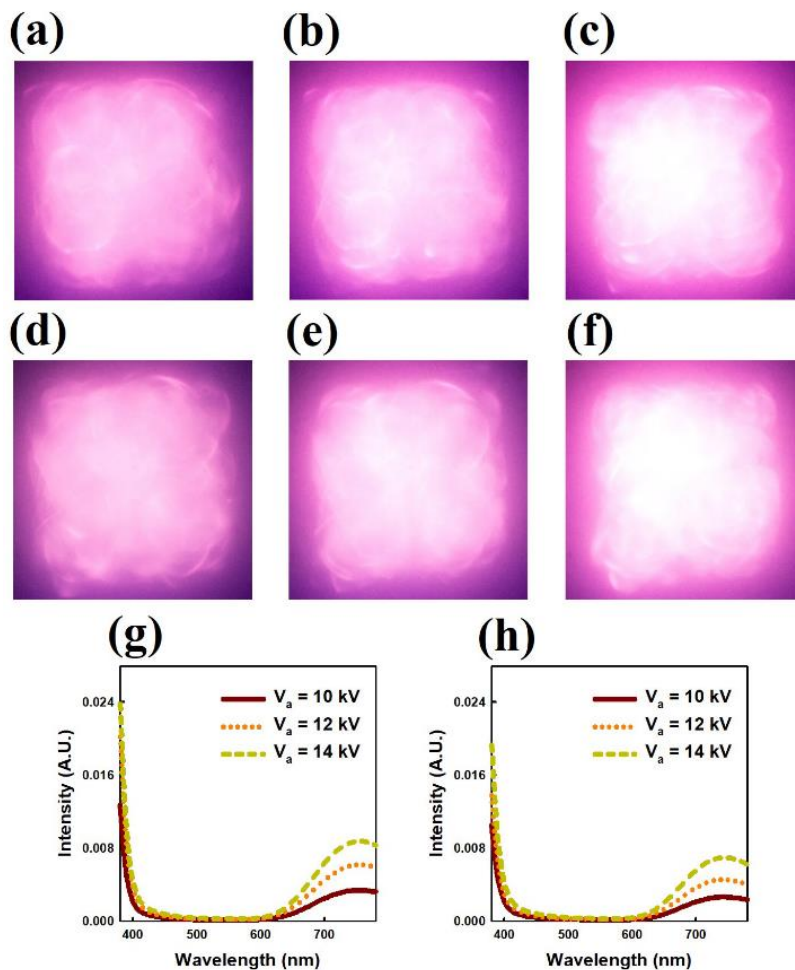

**Figure S2.** (a), (b) and (c) are photographs when  $V_a$  is 10kV, 12 kV and 14 kV, using 5 mm thick quartz as the window, respectively. (d), (e) and (f) are photographs when  $V_a$  is 10 kV, 12 kV and 14 kV using 10 mm thick glass as window. (g) and (h) are spectra when using quartz and glass as window materials, respectively.

3. Power conversion efficiency (PCE) comparison of different UVC light sources.<sup>1-18</sup> The PCE of 226 nm UVC light produced by C-beam pumping is 0.87%, which is the highest PCE at wavelengths below 230 nm.

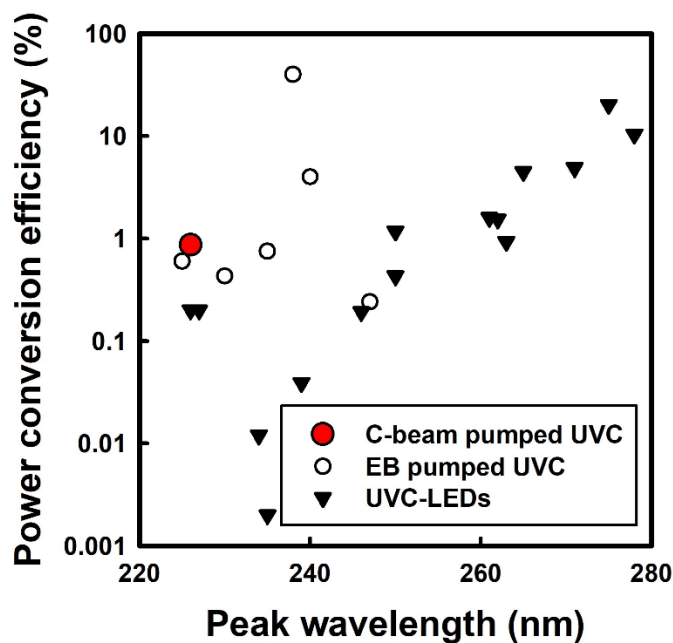

**Figure S3.** PCE with different UVC light sources.

#### REFERENCES

- (1) Kneissl, M.; Seong, T.-Y.; Han, J.; Amano, H. The Emergence and Prospects of Deep-Ultraviolet Light-Emitting Diode Technologies. *Nat. Photonics* **2019**, *13*, 233–244.
- (2) Li, D.; Jiang, K.; Sun, X.; Guo, C. AlGaIn Photonics: Recent Advances in Materials and Ultraviolet Devices. *Adv. Opt. Photonics* **2018**, *10*, 43.
- (3) Hirayama, H.; Fujikawa, S.; Noguchi, N.; Norimatsu, J.; Takano, T.; Tsubaki, K.; Kamata, N. 222–282 nm AlGaIn and InAlGaIn-Based Deep-UV LEDs Fabricated on High-Quality AlN on Sapphire. *Phys. Status Solidi (a)* **2009**, *206*, 1176–1182.

- (4) Shatalov, M.; Sun, W.; Lunev, A.; Hu, X.; Dobrinsky, A.; Bilenko, Y.; Yang, J.; Shur, M.; Gaska, R.; Moe, C.; et al. AlGa<sub>N</sub> Deep-Ultraviolet Light-Emitting Diodes with External Quantum Efficiency above 10%. *Appl. Phys. Express* **2012**, *5*, 082101.
- (5) Takano, T.; Mino, T.; Sakai, J.; Noguchi, N.; Tsubaki, K.; Hirayama, H. Deep-Ultraviolet Light-Emitting Diodes with External Quantum Efficiency Higher than 20% at 275 nm Achieved by Improving Light-Extraction Efficiency. *Appl. Phys. Express* **2017**, *10*, 031002.
- (6) Grandusky, J. R.; Chen, J.; Gibb, S. R.; Mendrick, M. C.; Moe, C. G.; Rodak, L.; Garrett, G. A.; Wraback, M.; Schowalter, L. J. 270 nm Pseudomorphic Ultraviolet Light-Emitting Diodes with Over 60 mW Continuous Wave Output Power. *Appl. Phys. Express* **2013**, *6*, 032101.
- (7) Mehnke, F.; Kuhn, C.; Guttman, M.; Reich, C.; Kolbe, T.; Kueller, V.; Knauer, A.; Lapeyrade, M.; Einfeldt, S.; Rass, J.; et al. Efficient Charge Carrier Injection into Sub-250 nm AlGa<sub>N</sub> Multiple Quantum Well Light Emitting Diodes. *Appl. Phys. Lett.* **2014**, *105*, 051113.
- (8) Hirayama, H.; Tsukada, Y.; Maeda, T.; Kamata, N. Marked Enhancement in the Efficiency of Deep-Ultraviolet AlGa<sub>N</sub> Light-Emitting Diodes by Using a Multiquantum-Barrier Electron Blocking Layer. *Appl. Phys. Express* **2010**, *3*, 031002.
- (9) Kneissl, M.; Kolbe, T.; Chua, C.; Kueller, V.; Lobo, N.; Stellmach, J.; Knauer, A.; Rodriguez, H.; Einfeldt, S.; Yang, Z.; et al. Advances in Group III-Nitride-Based Deep UV Light-Emitting Diode Technology. *Semicond. Sci. Technol.* **2010**, *26*, 014036.

- (10) Inoue, S.; Tamari, N.; Taniguchi, M. 150 mW Deep-Ultraviolet Light-Emitting Diodes with Large-Area AlN Nanophotonic Light-Extraction Structure Emitting at 265 nm. *Appl. Phys. Lett.* **2017**, *110*, 141106.
- (11) Liu, D.; Cho, S. J.; Park, J.; Gong, J.; Seo, J.-H.; Dalmau, R.; Zhao, D.; Kim, K.; Kim, M.; Kalapala, A. R. K.; et al. 226 nm AlGaIn/AlN UV LEDs Using p-Type Si for Hole Injection and UV Reflection. *Appl. Phys. Lett.* **2018**, *113*, 011111.
- (12) Kinoshita, T.; Obata, T.; Nagashima, T.; Yanagi, H.; Moody, B.; Mita, S.; Inoue, S.; Kumagai, Y.; Koukitu, A.; Sitar, Z. Performance and Reliability of Deep-Ultraviolet Light-Emitting Diodes Fabricated on AlN Substrates Prepared by Hydride Vapor Phase Epitaxy. *Appl. Phys. Express* **2013**, *6*, 092103.
- (13) Watanabe, K.; Taniguchi, T.; Niiyama, T.; Miya, K.; Taniguchi, M. Far-Ultraviolet Plane-Emission Handheld Device Based on Hexagonal Boron Nitride. *Nat. Photonics* **2009**, *3*, 591–594.
- (14) Oto, T.; Banal, R. G.; Kataoka, K.; Funato, M.; Kawakami, Y. 100 mW Deep-Ultraviolet Emission from Aluminium-Nitride-Based Quantum Wells Pumped by an Electron Beam. *Nat. Photonics* **2010**, *4*, 767–770.
- (15) Tabataba-Vakili, F.; Wunderer, T.; Kneissl, M.; Yang, Z.; Teepe, M.; Batres, M.; Feneberg, M.; Vancil, B.; Johnson, N. M. Dominance of Radiative Recombination from Electron-Beam-Pumped Deep-UV AlGaIn Multi-Quantum-Well Heterostructures. *Appl. Phys. Lett.* **2016**, *109*, 181105.

- (16) Ivanov, S. V.; Jmerik, V. N.; Nechaev, D. V.; Kozlovsky, V. I.; Tiberi, M. D. E-Beam Pumped Mid-UV Sources Based on MBE-Grown AlGa<sub>N</sub> MQW. *Phys. Status Solidi (a)* **2015**, *212*, 1011.
- (17) Matsumoto, T.; Iwayama, S.; Saito, T.; Kawakami, Y.; Kubo, F.; Amano, H. Handheld Deep Ultraviolet Emission Device Based on Aluminum Nitride Quantum Wells and Graphene Nanoneedle Field Emitters. *Opt. Express* **2012**, *20*, 24320.
- (18) Jmerik, V. N.; Nechaev, D. V.; Toropov, A. A.; Evropeitsev, E. A.; Kozlovsky, V. I.; Martovitsky, V. P.; Rouvimov, S.; Ivanov, S. V. High-Efficiency Electron-Beam-Pumped Sub-240-nm Ultraviolet Emitters Based on Ultra-Thin GaN/AlN Multiple Quantum Wells Grown by Plasma-Assisted Molecular-Beam Epitaxy on c-Al<sub>2</sub>O<sub>3</sub>. *Appl. Phys. Express* **2018**, *11*, 091003.
